# Supplementary material for: The Impact of Foods, Nutrients, or Dietary Patterns on Telomere Length in Childhood and Adolescence: A Systematic Review
Source: MDPI journal article supplement (doi:10.3390/nu14193885), 2022-09-20
Supplement: s1 [file s1]

# INFORME DE BÚSQUEDA

**Cliente:** Eva María Navarrete Muñoz

**Fecha de envío:** 21 junio 2021

**Referencia:** abb-bq001/21

## 1. Pregunta de investigación.

¿La ingesta alta de nutrientes, alimentos, grupo de alimentos o patrones dietéticos influye en la longitud del telómero en niños de 2 a 18 años más que la ingesta baja?

### 1.1. Objetivo general

**Primarios:** Qué asociación existe entre la ingesta de nutrientes, alimentos, grupos de alimentos o patrones alimentarios y la longitud del telómero en la infancia o la adolescencia (2-18 años)

**Secundarios:**

- Describir las asociaciones entre la ingesta de nutrientes, nutrientes, alimentos, grupo de alimentos o patrones dietéticos y la longitud del telómero según sexos.
- Describir las asociaciones entre la ingesta de nutrientes, nutrientes, alimentos, grupo de alimentos o patrones dietéticos y la longitud del telómero según el método de determinación de la longitud del telómero.
- Describir las asociaciones entre la ingesta de nutrientes, nutrientes, alimentos, grupo de alimentos o patrones dietéticos y la longitud del telómero según el tejido donde se realizó la determinación de la longitud del telómero.

## 2. Search Report

Qué asociación existe entre la ingesta de nutrientes, alimentos, grupos de alimentos o patrones alimentarios y la longitud del telómero en la infancia o la adolescencia (2-18 años)

In children 2 to 18 years of age, does high intake of nutrients, foods, food groups, or dietary patterns influence telomere length?

| Population                     | Intervention                                                                                                                                                                                                                                                                  | Comparator | Outcomes        |
|--------------------------------|-------------------------------------------------------------------------------------------------------------------------------------------------------------------------------------------------------------------------------------------------------------------------------|------------|-----------------|
| healthy children 2-to-18 years | nutrients / food / food groups / dietary patterns                                                                                                                                                                                                                             |            | telomere length |
| Type of question               | Type of studies                                                                                                                                                                                                                                                               |            |                 |
| Exposition                     | Systematic reviews & metaanalysis (1) / CCT (2) / RCT (3) / cohort studies (4) / case-control studies (5) / cross-sectional studies (6) / case reports (7) / practice guidelines (8) / review (9) / cost-analysis (10) / editorial, comments, letter, retracted articles (11) |            |                 |
| Notas                          | Gold standard articles: PMID: 25131600 / PMID: 33543592 / PMID: 32558330                                                                                                                                                                                                      |            |                 |

| Databases          | Fecha de búsqueda | Estrategias de búsqueda* | Ítems totales |
|--------------------|-------------------|--------------------------|---------------|
| PubMed             | 17/06/2021        | Appendix 1               | 319           |
| EMBASE             | 13/06/2021        | Appendix 2               | 17            |
| CENTRAL            | 13/06/2021        | Appendix 3               | 18            |
| Clinicaltrials.gov | 14/06/2021        | Appendix 4               | 0             |
| IRCTP (WHO)        | 14/06/2021        | Appendix 5               | N/A           |

En los apéndices se incluirá también la historia de la búsqueda en el formato de descarga de la base de datos.

| Type of Studies    |    |    |    |    |    |    |    |   |    |    |    |
|--------------------|----|----|----|----|----|----|----|---|----|----|----|
| Bases de datos     | 1  | 2  | 3  | 4  | 5  | 6  | 7  | 8 | 9  | 10 | 11 |
| PubMed             | 5  | 75 | 10 | 55 | 14 | 34 | 13 | 0 | 64 | 2  | 3  |
| EMBASE             | 17 |    |    |    |    |    |    |   |    |    |    |
| CENTRAL            | -  | 18 | -  | -  | -  | -  | -  | - | -  | -  | -  |
| ClinicalTrials.gov | -  |    | -  | -  | -  | -  | -  | - | -  | -  | -  |

|                        |   |  |   |   |   |   |   |   |   |   |   |
|------------------------|---|--|---|---|---|---|---|---|---|---|---|
| ICRTP (WHO)            | - |  | - | - | - | - | - | - | - | - | - |
| Totales sin duplicados |   |  |   |   |   |   |   |   |   |   |   |

### 3. Appendix:

#### 3.1. APPENDIX 1. MedLine search strategy via PubMed:

("Telomere"[MeSH Terms] OR "Telomere Shortening"[MeSH Terms] OR "Telomerase"[MeSH Terms] OR "telomer\*" [Text Word]) AND ("Diet"[MeSH Terms] OR "diet\*" [Text Word] OR "nutrition\*" [Text Word] OR "Nutrients"[MeSH Terms] OR "nutrient\*" [Text Word] OR "Food"[MeSH Terms] OR "food\*" [Text Word] OR "Feeding Behavior"[MeSH Terms] OR "feed\*" [Text Word] OR "eat" [Text Word] OR "eating" [Text Word] OR "Alcohol Drinking"[MeSH Terms] OR "alcohol\*" [Text Word] OR "drink\*" [Text Word]) AND ("Fetus"[MeSH Terms] OR "fetus\*" [Text Word] OR "foetus\*" [Text Word] OR "fetal\*" [Text Word] OR "foetal\*" [Text Word] OR "infant"[MeSH Terms] OR "infant, newborn"[MeSH Terms] OR "infant, low birth weight"[MeSH Terms] OR "infant, small for gestational age"[MeSH Terms] OR "infant, very low birth weight"[MeSH Terms] OR "infant, extremely low birth weight"[MeSH Terms] OR "infant, postmature"[MeSH Terms] OR "infant, premature"[MeSH Terms] OR "infant, extremely premature"[MeSH Terms] OR "infan\*" [Text Word] OR "newborn\*" [Text Word] OR "neonat\*" [Text Word] OR "neo nat\*" [Text Word] OR "low birth weight\*" [Text Word] OR "postmatur\*" [Text Word] OR "prematur\*" [Text Word] OR "preterm\*" [Text Word] OR "Premature Birth"[MeSH Terms] OR "baby" [Text Word] OR "babies" [Text Word] OR "toddler\*" [Text Word] OR "Neonatology"[MeSH Terms] OR "Perinatology"[MeSH Terms] OR "perinat\*" [Text Word] OR "postnat\*" [Text Word] OR "post nat\*" [Text Word] OR "child, preschool"[MeSH Terms] OR "schools, nursery"[MeSH Terms] OR "preschool\*" [Text Word] OR "pre school\*" [Text Word] OR "nursery school\*" [Text Word] OR "pre adolescen\*" [Text Word] OR "preadolescen\*" [Text Word] OR "prepub\*" [Text Word] OR "pre pub\*" [Text Word] OR "primary education\*" [Text Word] OR "primary school\*" [Text Word] OR "adolescent"[MeSH Terms] OR "adolescen\*" [Text Word] OR "teen\*" [Text Word] OR "youth\*" [Text Word] OR "juvenil\*" [Text Word] OR "Puberty"[MeSH Terms] OR "puber\*" [Text Word] OR "pubesc\*" [Text Word] OR "child"[MeSH Terms] OR "child\*" [Text Word] OR "boy" [Text Word] OR "boys" [Text Word] OR "boyhood\*" [Text Word] OR "girl" [Text Word] OR "girls" [Text Word] OR "kid" [Text Word] OR "kids" [Text Word] OR "underage\*" [Text Word] OR "under age\*" [Text Word] OR "under age\*" [Text Word] OR "minors" [Text Word] OR "school\*" [Text Word] OR "secondary education\*" [Text Word] OR "secondary school\*" [Text Word] OR "highschool\*" [Text Word] OR "high school\*" [Text Word] OR "Pediatrics"[MeSH Terms] OR "pediatr\*" [Text Word])

### 3.2. APPENDIX 2. Embase search strategy:

| No. | Query Results                                                                                                                                                                                                                                                                                                                                                                                                                                                                                                                                                                                                                                                                                                                                                                                                                                                                                                                                                                                                                                   | Results Date      |
|-----|-------------------------------------------------------------------------------------------------------------------------------------------------------------------------------------------------------------------------------------------------------------------------------------------------------------------------------------------------------------------------------------------------------------------------------------------------------------------------------------------------------------------------------------------------------------------------------------------------------------------------------------------------------------------------------------------------------------------------------------------------------------------------------------------------------------------------------------------------------------------------------------------------------------------------------------------------------------------------------------------------------------------------------------------------|-------------------|
| #6. | ((('telomere'/exp OR 'telomere' OR 'telomere length'/exp OR 'telomere length' OR 'telomerase' OR 'telomere shortening' OR telomer*) AND ('diet'/exp OR 'diet' OR 'nutrition'/exp OR 'nutrition' OR 'nutrient'/exp OR 'nutrient' OR 'food'/exp OR 'food' OR 'feeding'/exp OR 'feeding' OR 'feeding behavior'/exp OR 'feeding behavior' OR food* OR 'eating'/exp OR 'eating' OR 'eating habit'/exp OR 'eating habit' OR eat* OR diet* OR feed* OR nutrition* OR nutrient* OR 'alcohol consumption'/exp OR 'alcohol consumption' OR 'alcohol'/exp OR 'alcohol' OR alcohol* OR 'drinking behavior'/exp OR 'drinking behavior' OR 'drinking'/exp OR 'drinking' OR drink*) AND ([article]/lim OR [article in press]/lim OR [data papers]/lim OR [editorial]/lim OR [erratum]/lim OR [letter]/lim OR [note]/lim OR [review]/lim OR [short survey]/lim) AND ([embryo]/lim OR [fetus]/lim OR [newborn]/lim OR [infant]/lim OR [child]/lim OR [preschool]/lim OR [school]/lim OR [adolescent]/lim)) AND [embase]/lim NOT ([embase]/lim AND [medline]/lim) | 17 13 Jun 2021    |
| #5. | ('telomere'/exp OR 'telomere' OR 'telomere length'/exp OR 'telomere length' OR 'telomerase' OR 'telomere shortening' OR telomer*) AND ('diet'/exp OR 'diet' OR 'nutrition'/exp OR 'nutrition' OR 'nutrient'/exp OR 'nutrient' OR 'food'/exp OR 'food' OR 'feeding'/exp OR 'feeding' OR 'feeding behavior'/exp OR 'feeding behavior' OR food* OR 'eating'/exp OR 'eating' OR 'eating habit'/exp OR 'eating habit' OR eat* OR diet* OR feed* OR nutrition* OR nutrient* OR 'alcohol consumption'/exp OR 'alcohol consumption' OR 'alcohol'/exp OR 'alcohol' OR alcohol* OR 'drinking behavior'/exp OR 'drinking behavior' OR 'drinking'/exp OR 'drinking' OR drink*) AND ([article]/lim OR [article in press]/lim OR [data papers]/lim OR [editorial]/lim OR [erratum]/lim OR [letter]/lim OR [note]/lim OR [review]/lim OR [short survey]/lim) AND ([embryo]/lim OR [fetus]/lim OR [newborn]/lim OR [infant]/lim OR [child]/lim OR [preschool]/lim OR [school]/lim OR [adolescent]/lim)                                                          | 320 13 Jun 2021   |
| #4. | ('telomere'/exp OR 'telomere' OR 'telomere                                                                                                                                                                                                                                                                                                                                                                                                                                                                                                                                                                                                                                                                                                                                                                                                                                                                                                                                                                                                      | 4,266 13 Jun 2021 |

length'/exp OR 'telomere length' OR 'telomerase'  
OR 'telomere shortening' OR telomer\*) AND  
( 'diet'/exp OR 'diet' OR 'nutrition'/exp OR  
'nutrition' OR 'nutrient'/exp OR 'nutrient' OR  
'food'/exp OR 'food' OR 'feeding'/exp OR  
'feeding' OR 'feeding behavior'/exp OR 'feeding  
behavior' OR food\* OR 'eating'/exp OR 'eating' OR  
'eating habit'/exp OR 'eating habit' OR eat\* OR  
diet\* OR feed\* OR nutrition\* OR nutrient\* OR  
'alcohol consumption'/exp OR 'alcohol  
consumption' OR 'alcohol'/exp OR 'alcohol' OR  
alcohol\* OR 'drinking behavior'/exp OR 'drinking  
behavior' OR 'drinking'/exp OR 'drinking' OR  
drink\*) AND ([article]/lim OR [article in  
press]/lim OR [data papers]/lim OR  
[editorial]/lim OR [erratum]/lim OR [letter]/lim  
OR [note]/lim OR [review]/lim OR [short  
survey]/lim)

#3. ('telomere'/exp OR 'telomere' OR 'telomere  
length'/exp OR 'telomere length' OR 'telomerase'  
OR 'telomere shortening' OR telomer\*) AND 5,119 13 Jun 2021

( 'diet'/exp OR 'diet' OR 'nutrition'/exp OR  
'nutrition' OR 'nutrient'/exp OR 'nutrient' OR  
'food'/exp OR 'food' OR 'feeding'/exp OR  
'feeding' OR 'feeding behavior'/exp OR 'feeding  
behavior' OR food\* OR 'eating'/exp OR 'eating' OR  
'eating habit'/exp OR 'eating habit' OR eat\* OR  
diet\* OR feed\* OR nutrition\* OR nutrient\* OR  
'alcohol consumption'/exp OR 'alcohol  
consumption' OR 'alcohol'/exp OR 'alcohol' OR  
alcohol\* OR 'drinking behavior'/exp OR 'drinking  
behavior' OR 'drinking'/exp OR 'drinking' OR  
drink\*)

#2. 'diet'/exp OR 'diet' OR 'nutrition'/exp OR 4,674,784 13 Jun 2021

'nutrition' OR 'nutrient'/exp OR 'nutrient' OR  
'food'/exp OR 'food' OR 'feeding'/exp OR  
'feeding' OR 'feeding behavior'/exp OR 'feeding  
behavior' OR food\* OR 'eating'/exp OR 'eating' OR  
'eating habit'/exp OR 'eating habit' OR eat\* OR  
diet\* OR feed\* OR nutrition\* OR nutrient\* OR  
'alcohol consumption'/exp OR 'alcohol  
consumption' OR 'alcohol'/exp OR 'alcohol' OR  
alcohol\* OR 'drinking behavior'/exp OR 'drinking  
behavior' OR 'drinking'/exp OR 'drinking' OR  
drink\*

#1. 'telomere'/exp OR 'telomere' OR 'telomere  
length'/exp OR 'telomere length' OR 'telomerase'  
OR 'telomere shortening' OR telomer\* 58,022 13 Jun 2021

### 3.3. APPENDIX 3. CENTRAL search strategy:

Date Run: 13/06/2021 18:19:03

| ID  | Search Hits                                                                                                               |
|-----|---------------------------------------------------------------------------------------------------------------------------|
| #1  | MeSH descriptor: [Telomere] explode all trees 55                                                                          |
| #2  | MeSH descriptor: [Telomere Shortening] explode all trees 18                                                               |
| #3  | MeSH descriptor: [Telomerase] explode all trees 52                                                                        |
| #4  | (telomer*):ti,ab,kw (Word variations have been searched) 528                                                              |
| #5  | #1 OR #2 OR #3 OR #4 528                                                                                                  |
| #6  | MeSH descriptor: [Diet] explode all trees 18928                                                                           |
| #7  | MeSH descriptor: [Nutrients] explode all trees 5332                                                                       |
| #8  | MeSH descriptor: [Food] explode all trees 35426                                                                           |
| #9  | MeSH descriptor: [Feeding Behavior] explode all trees 9101                                                                |
| #10 | MeSH descriptor: [Eating] explode all trees 3674                                                                          |
| #11 | MeSH descriptor: [Alcohol Drinking] explode all trees 3968                                                                |
| #12 | (diet* OR nutrient* OR food* OR feed* OR eat* OR alcohol* OR drink*):ti,ab,kw (Word variations have been searched) 190668 |
| #13 | #6 OR #7 OR #8 OR #9 OR #10 OR #11 OR #12 198166                                                                          |
| #14 | #5 AND #13 115                                                                                                            |
| #15 | MeSH descriptor: [Infant] explode all trees 32816                                                                         |
| #16 | MeSH descriptor: [Child] explode all trees 57420                                                                          |
| #17 | MeSH descriptor: [Adolescent] explode all trees 105819                                                                    |
| #18 | (child* OR adolescen* OR infant*):ti,ab,kw (Word variations have been searched) 285326                                    |
| #19 | #15 OR #16 OR #17 OR #18 285326                                                                                           |
| #20 | #14 AND #19 18                                                                                                            |

### 3.4. APPENDIX 4. ClinicalTrials.gov search strategy:

NIH U.S. National Library of Medicine  
**ClinicalTrials.gov**

Find Studies About Studies Submit Studies Resources About Site PRS Login

Home > Search Results

Hide Search Start Over

Condition or disease <sup>?</sup> Other terms <sup>?</sup>

Telomere\* x (diet\* OR nutriti\* OR food\*) x

Country <sup>?</sup>

Search Advanced Search

No Studies found for: (diet\* OR nutriti\* OR food\*) | Telomere\* | Child

Applied Filters: ☒ Child (birth-17)

Your search found no studies.  
Modify your search, check for misspellings, try other words.

List By Topic On Map Search Details

Hide Filters

Filters

Apply Clear

Status

### 3.5. APPENDIX 5. IC RTP (WHO) search strategy

The requested URL was rejected. Please consult with your administrator.  
Your support ID is: 15612090574454605129

## Contacto

**María García-Puente**

**Alter Biblio**

info@alterbiblio.com

(+34) 675143538

-

**Referencia de este trabajo:**

abb-bq001/21
